# 1 Eye-tracking for low vision with virtual reality (VR): testing status quo 2 usability of the HTC Vive Pro Eye

3 Alexandra Sipatchin<sup>1</sup>, Siegfried Wahl<sup>1,2</sup>, Katharina Rifai<sup>1,2</sup>

4

5 <sup>1</sup>Institute for Ophthalmic Research, Tübingen, Germany.

6 <sup>2</sup>Carl Zeiss Vision International GmbH, Aalen, Germany.

7

8 Corresponding author:

9 Alexandra Sipatchin<sup>1</sup>

10 ZEISS Vision Science Lab, Universitätsklinikum Tübingen

11 Elfriede-Aulhorn-Str. 7, 72076 Tübingen

12 e-mail: alexandra.sipatchin@uni-tuebingen.de

13

## 14 Abstract

15 **Background.** Adding an eye tracker inside a head-mounted display (HMD) can offer a variety of  
16 novel functions in virtual reality (VR). Promising results point towards its usability as a flexible  
17 and interactive tool for low vision assessments and research of low vision functional impairment.  
18 Visual field (VF) perimetry performed using VR methodologies evidenced a correlation between  
19 the reliability of visual field testing in VR and the Humphrey test. The simulation of visual loss  
20 in VR is a powerful method used to investigate the impact and the adaptation to visual diseases.  
21 The present study presents a preliminary assessment of the HTC Vive Pro Eye for its potential  
22 use for these applications.

23 **Methods.** We investigated data quality over a wide visual field and tested the effect of head  
24 motion. An objective direct end-to-end temporal precision test simulated two different scenarios:  
25 the appearance of a pupil inside the eye tracker and a shift in pupil position, known as artificial  
26 saccade generator. The technique is low-cost thanks to a Raspberry Pi system and automatic.

27 **Results.** The target position on the screen and the head movement limit the HTC Vive Pro Eye's  
28 usability. All the simulated scenarios showed a system's latency of 58.1 milliseconds (ms).

29 **Conclusion.** These results point towards limitations and improvements of the HTC Vive Pro  
30 Eye's status quo for visual loss simulation scenarios and visual perimetry testing.

## 31 Introduction

32 Eye-tracking is a recognized technique used to investigate the relation between eye movements  
33 and human cognition. Its first use dates back to the 19th century when Huey (1898) and  
34 Delabarre (1898) for the first time traced eye movements on a rotating drum. Buswell (1935)  
35 reported the first systematic exploration of the fixation position. In comparison, eye tracking in  
36 VR is a relatively new field with its first application in gaze-contingent studies, starting only two  
37 decades ago (Danforth et al., 2000; Tanriverdi and Jacob, 2000).

38 Gaze-contingent studies use actively or passively the gaze as an input. For gaze-contingent active  
39 scenarios, gaze can actively perform an action and substitute a mouse to select stimuli, open  
40 menus. Passive contingent studies use gaze to change a display dynamically. For example, for  
41 foveated rendering, the central part of the screen maintains a high resolution. In contrast, the  
42 peripheral part is being updated with a lower amount of detail before the end of each change in  
43 gaze position (Holmqvist et al., 2011). Most of the studies assume that the participant is not  
44 aware of the changing display since during a saccade stimuli are invisible (Brooks and Fuchs,  
45 1975; Riggs et al., 1982). Human saccadic movements appear to be stereotyped (Becker, 1989)  
46 and accurate, even beyond 60 years old (Warabi et al., 1984; Munoz et al., 1998). Saccades are  
47 very brief eye movements, and their duration depends upon the amplitude. For reading, saccades  
48 last from 20 to 40 milliseconds (ms) (Rayner et al., 2001) and a 5°, 10°, 15°, and 20° saccade  
49 have a mean duration between 31 and 54 ms (Baloh et al., 1975; Bahill et al., 1981; Becker,  
50 1989; Thickbroom et al., 1991; Behrens et al., 2010; Gibaldi et al., 2017).

51 For active gaze-contingent paradigms, eye-tracking accuracy and precision must be high so that  
52 the data samples are being correctly identified as belonging to the displayed button area for as  
53 long as it is being fixated (Holmqvist et al., 2011). Accuracy is the average angular error  
54 between the measured and the location of the intended fixation target. Precision is the spread of  
55 the gaze positions when a user is fixating a known location in space (Holmqvist et al., 2011;  
56 Gibaldi et al., 2017). For passive applications, the system's latency has to be lower than the  
57 saccade duration. Temporal precision is the average end-to-end delay from the tracked eye's  
58 actual movement until the recording device signals that the movement has occurred (Holmqvist  
59 et al., 2011). Passive gaze-contingent scenarios need an eye tracker with good temporal  
60 precision.

61 Research about eye-tracking data quality in VR is limited (Lohr et al., 2019), with most studies  
62 investigating the head-mounted display's (HMD) tracking accuracy (Niehorster et al., 2017;  
63 Borges et al., 2018; Peer et al., 2018; Groves et al., 2019). The present study represents a pilot  
64 study to evaluate the usability of the HTC Vive Pro Eye integrated eye-tracker (Vive, 2019a) for  
65 a visual field (VF) testing and simulation of low vision.

66 According to the International Classification of Disease, 10th Revision (ICD-10) low vision  
67 coincides with a visual acuity value of less than 6/13 (0.3) but equal or higher than 3/60(0.05) for  
68 the better eye using correction (Thylefors et al., 1995). Disorders that cause low vision are age-  
69 related macular degeneration (AMD), glaucoma or retinitis pigmentosa (Donders, 1957; Berger  
70 and Porell, 2008; Jager et al., 2008; Mantravadi and Vadhar, 2015). Symptoms include blurred  
71 vision, central and/or peripheral VF loss. A VF test can identify damages in central and  
72 peripheral vision covering a visual field up to  $\pm 30^\circ$  temporally and nasally.

73 The concept of VR for VF perimetry testing appeared in 1998 (Kasha, 1998). Since then, studies  
74 tested its comparability to the standard Humphrey visual field analyzer (HFA, Carl Zeiss  
75 Meditec Inc, California, USA) with mixed results (Hollander et al., 2000; Plummer et al., 2000;  
76 Tsapakis et al., 2017; Erichev et al., 2018; Mees et al., 2020). Gaze tracking for VR VF testing  
77 adds new resources for the advancement of mobile and portable perimetry. Eye-tracking makes it  
78 so that stimuli can appear at the fixation area, and it can implement more objective criteria to

79 capture responses similar to active gaze-contingent paradigms, like, for example, a visual grasp  
80 mode (Wroblewski et al., 2014). Visual grasp is based on the so-called eye movement perimetry.  
81 It overcomes long periods of fixation of peripheral stimuli common to standard perimetry (Trobe  
82 et al., 1989). During central fixation, a stimulus appears and induces an automatic reflex towards  
83 the new target. When the gaze change is consistent with the new target position, the test  
84 identifies that part of the visual field as intact, and it moves forward. After correct identification,  
85 the new stimulus becomes the new fixation. This is the idea behind a hand-free visual grasp  
86 mode where the gaze replaces the patient's response (Wroblewski et al., 2014).

87 Visual impairments simulations in VR safely investigate the effect and the adaptability to visual  
88 defects. Simulations of the appearance of the visual loss allow controlled and comparable effects  
89 across subjects (Bertera, 1988; Bertera 1992). These studies use passive gaze-contingent  
90 applications that take the gaze input to simulate low vision on a display that continuously  
91 updates where the subject is looking. Extensive studies showed that normal subjects develop  
92 similar visual strategies to adapt to low vision as patients do (Bertera 1992; Zangemeister and  
93 Oechsner, 1999; Kwon et al., 2013; Walsh and Liu, 2014; Geringswald and Pollmann, 2015;  
94 Barraza-Bernal et al., 2017a; Barraza-Bernal et al., 2017b) and can be used to study their impact  
95 (Barraza-Bernal et al., 2018).

96 A head-still condition investigates the HTC Vive Pro Eye for a VF VR usability. The test  
97 examines data quality across a wide visual field to check for limits from target position on screen  
98 (Feit et al., 2017). A head-moving situation tests the system under free head movement to  
99 investigate possible low precision and/or data loss induced by movement (Holmqvist et al., 2011;  
100 Holmqvist et al., 2012; Niehorster et al., 2020).

101 For its applicability for visual loss simulations, a direct, objective, and automatized end-to-end  
102 method examines the temporal precision, based on existing end-to-end tests (Reingold, 2014;  
103 Saunders and Woods, 2014; Gibaldi et al., 2017). Direct end-to-end measurements of latency are  
104 more reliable compared to non-direct tests since interactions between different systems are hard  
105 to predict (Saunders and Woods, 2014). An artificial pupil and a saccade generator are used to  
106 examine the average time between the onset of an artificial eye and successive saccade and the  
107 display of the first eye-tracking data showing a change on the display. Unlike the use of a human  
108 observer, the major advantages are identical motion sequences that can be reproduced multiple  
109 times and tight control over the input given to the tracker without additional delays that can be  
110 induced by a subjective input, such as a human observer (Reingold, 2014).

## 111 **Materials and methods**

### 112 *Participants*

113 Eleven participants took part in the data quality assessment test (6 females and 5 males, mean  
114 age 28.73, standard deviation (SD):  $\pm 2.49$  years, 5 with bright eye color and 6 with dark; 6  
115 having previous experience with the eye tracker; 8 wearing eye-correction, 3 wearing contacts  
116 and 5 wearing corrective glasses, the rest did not need correction). The direct end-to-end method  
117 for latency required no participants.

## 118 ***HMD: eye-tracking and display***

119 We collected eye-tracking data in VR using the built-in Tobii eye tracker (Core SW 2.16.4.67)  
120 with an autonomous eye-tracking algorithm processing integrated (Tech, 2019) and a sampling  
121 frequency of 120 Hz (Vive, 2019a).

122 Nine near-infrared light (NIR) illuminators per eye illuminate the eye for pupil center corneal  
123 reflection (PCCR) for non-intrusive eye tracking (Pro, 2015a). One infrared (IR) camera per each  
124 eye, placed inside the lens-display tube, captures the reflections (Wiltz, 2019). The image  
125 captured is used to identify the provoked reflection patterns on the cornea and pupil and calculate  
126 a vector between the two reflections. The direction of this vector represents the gaze direction.  
127 The illumination technique used is a proprietary illumination method built to collect eye-tracking  
128 data from a population wearing glasses, hard and soft contact lenses. Tobii Pro SDK v1.7.1.1081  
129 (Pro, 2015b) and Vive SRanipal SDK v1.1.0.1 (Vive, 2019b) are used to access non-filtered and  
130 filtered eye-tracking data, respectively. The system's accuracy estimation is  $0.5^\circ$  to  $1.1^\circ$  within a  
131 field of view of  $20^\circ$  (Vive, 2019a).

132 The HMD has two AMOLED screens, with a resolution of  $2.880 \times 1.600$  pixels in total ( $1.440 \times$   
133  $1.600$  pixels to each eye resulting in a pixel density of 615 pixels per inch (PPI)), with a refresh  
134 rate of 90 Hz and a field of view of  $110^\circ$  (Vive, 2019a).

## 135 ***Calibration procedure***

136 HTC VIVE Pro Eye uses the Super Reality (SR) runtime to enable eye tracking. It offers  
137 calibration with five points. Calibration starts with a central point that shrinks to focus the gaze.  
138 It moves the other four points from one point to the next, shrinking and then disappearing to the  
139 next position. The eye tracker waits until data is collected. Calibration was carried out  
140 successfully for all participants.

## 141 ***Set-up***

142 For the virtual experiment, we used the Unity 2019.1.10f1 version as a design tool, with C# as a  
143 programming language, running on a PC with Windows 10 Home, having a 64-bit operating  
144 system, an Intel Core i7 -7700HQ, 2.8 GHz, 16 GB RAM, and a NVIDIA GeForce GTX 1070  
145 GDDR5 graphics card. We used a single-board computer, the Raspberry Pi (Raspberry Pi, model  
146 B 2018, full-price under 50 euros) controlling a Raspberry Pi camera (Version 2.1, with the  
147 capability of 120 Hz, full-price under 30 euros) for the end-to-end direct latency tests.

## 148 ***Experimental procedure***

### 149 ***Data quality measurements – Head Still and Head Free tests***

150 We tested accuracy and precision in a virtual environment where fixation targets (Figure 1A)  
151 were two concentric circles, one internal black and one external red circle with a radius of 0.72  
152 degrees of visual angle, positioned at 1 meter in a Unity world coordinate system. The target  
153 would appear at 25 different sample positions distributed across 5 columns and 5 rows covering  
154 a visual field of  $\pm 26.6^\circ$  (Figure 1B). We investigated two separate conditions: head-still and  
155 head-free. In the first condition, the target position was fixed to the HMD, and subjects had to

156 keep their head still, saccade to an appearing target, and fixate it. In the head-free condition,  
157 targets were positioned in a world-fixed coordinate system, and we instructed subjects to saccade  
158 towards the appearing target, fixate it and then move their head naturally, while fixating, towards  
159 the position where it appeared. Subjects performed the task in both conditions in a seated  
160 position on a chair. We randomized the target position, and we displayed the target for 5 seconds  
161 (Clemotte et al., 2014) with 5 repetitions (5 sec/target\*25 targets\*5 repetitions= 625 seconds,  
162 approximately 10 min and a half). In the head free condition, we added a central fixation target  
163 (coordinates: [0,0,0]) at the end of each target presentation that lasted 2 seconds. Central fixation  
164 after each fixation was added to make the participates come back to the same referencing point  
165 (5 sec/target+2 sec/central target\*25 targets\*5 repetitions = 875 seconds, approximately 15  
166 minutes). We used the Tobii Pro SDK to access non filtered data to avoid alteration of eye-  
167 tracking samples (Holmqvist et al., 2017; Orquin and Holmqvist, 2018).

### 168 *Temporal precision measurements – Eye-detection and Gaze-contingent tests*

169 The method uses a low-cost configuration (Figure 2A): a Raspberry Pi single-board computer  
170 controls the output of IR light-emitting diodes (LED) and records, with a Raspberry Pi camera,  
171 the resulting eye-tracking events displayed by the HMD.

172 The method tricks the eye tracker into two different scenarios: first into the detection of an eye,  
173 the eye-detection scenario, then next into an abrupt change in gaze position of the recognized  
174 artificial pupil, the gaze-contingent scenario. The first part of the study checks differences in  
175 latency when identifying an appearing eye between two different SDKs: Tobii Pro SDK  
176 v1.7.1.1081 and Vive SRanipal SDK v1.1.0.1 (Pro, 2015b; Vive, 2019b). The second scenario  
177 introduces a modified version of an artificial saccade generator (Reingold, 2014).

178 We used a virtual environment running on the PC which displayed ongoing successful and  
179 correct eye tracking. We used the Raspberry Pi for the eye-detection scenario to turn-on two IR  
180 LEDs and illuminate the Raspberry Pi camera for 1 second. This lead to clear IR reflections from  
181 the camera (figure 2A and B) and the HMD (Figure 2C). The reflections from the camera lead to  
182 a pupil-on event: the appearance of a green dot (Figure 2C). In this scenario, Tobii Pro SDK and  
183 SRanipal were both used to display the pupil-on event. We used the VR Positioning Guide  
184 Prefab, incorporated in the Tobii Pro SDK (Figure 2C, upper image) and a similar programmed  
185 version of the Prefab for the SRanipal SDK (Figure 2C, middle image).

186 For the gaze-contingent scenario, we used only the SRanipal SDK to display the pupil-on event  
187 and generate an artificial saccade. We placed two additional IR LEDs at a 1cm distance from the  
188 other two. The second pair of IR LEDs simulated an abrupt change in gaze position of the  
189 previously recognized artificial pupil. The Raspberry Pi turned off the first two at the same time.  
190 This produced the pupil shift event: an appearance of a bright red dot (Figure 2C, lower image).  
191 The pupil shift event did not disrupt the first pupil-on event since the display of this event was  
192 programmed such that a green dot should still be shown as long as an eye is being detected.

193 The Raspberry Pi camera controlled through the Raspberry single-board computer recorded the  
194 events displayed by the HMD (Figure 2C).

195 We recorded ten different videos for both scenarios, each with warming up camera period of 1  
196 sec and an interval of 2 seconds turn off of all LEDs. The Raspberry Pi produced 33 IR LED on-  
197 off trials for each video when using the Tobii Pro SDK leading to 330 repetitions and a recording  
198 time of 16.7 minutes. For the SRanipal SDK, 660 repetitions were recorded with a total time of  
199 21.7 minutes with each scenario having 33 IR LED on-off.

## 200 **Data analysis**

### 201 *Data Pre-Processing: Eye-tracking accuracy and precision*

202 The data provided by the Tobii Pro SDK Save Data Prefab at each sample data are HMD  
203 position and rotation, HMD-local eye position (vector of eye position measured in millimeters  
204 from the center of the HMD) and HMD-local gaze direction (a normalized vector re-referenced  
205 in HMD's coordinate system pointing from the pupil towards the virtual object) both for the left  
206 and right eye separately. It also provides additional gaze origin and direction vectors to indicate  
207 pupil position and direction transported into world coordinates. HMD's position vector and  
208 rotation quaternion are used to recalculate eye's position (rotated HMD-local eye position around  
209 the rotation quaternion is added to HMD position), while HMD-local gaze position is used to re-  
210 reference the new gaze direction (similar calculation to Clemotte et al., 2014, Eye-Gaze,  
211 normalized vector in this case).

212 For each sample, we averaged each HMD's local gaze coordinates for direction and origin. The  
213 same calculation is performed for the world-eye data automatically by the Prefab. In the head-  
214 still condition, we used the average of the HMD-local gaze direction and position vector, while  
215 in the head-free condition we took the world gaze already averaged vector as provided by the  
216 Tobii Pro SDK Prefab. The target position was saved at each sample, as defined by the  
217 experimental procedure in 3D Unity coordinates (Figure 1B). For each condition, the targets  
218 were then re-referenced to the eye by subtracting the eye's position vector from the target's  
219 coordinates (target vector - eye position vector).

220 For each sample data, we calculated the angle between the gaze direction vector (GD) and target-  
221 eye vector(TE) using the same formula (1) as Clemotte et al., 2014 to estimate the angle between  
222 two vectors (angleV).

$$223 \quad \text{angleV}(\text{GD}, \text{TE}) = \text{atan}(\text{norm}(\text{cross}(\text{GD}, \text{TE})), \text{dot}(\text{GD}, \text{TE})) \quad (1)$$

224 Atan calculates the inverse tangent, norm normalizes the vector, cross, and dot calculate the  
225 cross and the dot product respectively.

226 In the head-free condition, for each data sample, to separate between fixation during head-non-  
227 moving (Free\_stable) and fixation during head-moving phases (Free\_moving), we took the  
228 differential of the speed of the HMD's rotation quaternion rotated around a normalized vector.  
229 For the analysis, we discarded the first 500 ms (Clemotte et al., 2014) after the target appearance  
230 that was considered as the time a subject used to direct the gaze towards it. In both conditions,  
231 we excluded from the analysis gaze points where no eye could be tracked both for the left and  
232 the right eye before averaging to avoid large errors in the mean's calculation. For the data loss  
233 analysis, we kept gaze points where no eye was detected.

### 234 ***Data analysis: Eye-tracking accuracy and precision***

235 Accuracy is defined as the mean of all the angles (angleV) calculated between GD and TE using  
236 the formula described in (1). We used the common practice to calculate the spatial precision of  
237 the eye-tracker (Blignaut and Beelders, 2012), the root mean square (RMS) of the inter-sample  
238 angular distances between successive GDs. As an additional precision indicator, we also plotted  
239 a bivariate contour ellipse area (BCEA) for left, right, and the average of the two eyes to show  
240 the area that encompasses 50% of fixation points around the mean for each given target.

241 For the head-still condition before averaging between the two eyes, we conducted a one-way  
242 ANOVA test to check for differences in accuracy between the two eyes. We computed an overall  
243 average and an average for different percentiles of users for accuracy and precision. We  
244 calculated percentiles to analyze changes in eye data quality across the population tested.

245 A one-way ANOVA way tested how eye tracking data differs across screen regions with the  
246 horizontal line as the independent factor and the vertical ones as levels. Differences observed  
247 across the horizontal line might be an indication of the altering of eye-tracking data quality  
248 induced by reflections from vision corrections (Dahlberg, 2010).

249 In the head-free condition, we calculated the average precision as RMS and a one-way ANOVA  
250 tested how precision is affected by phases of stable head and moving head while subjects fixated  
251 the target. We also estimated the amount of data loss during the two phases. The data loss  
252 percentage was calculated using a similar formula (2) as Niehorster et al., 2020:

$$253 \quad \text{Data loss} = 100 * [(N_{\text{samples}} - N_{\text{valid\_samples}}) / N_{\text{expected\_samples}}] \quad (2)$$

254 where  $N_{\text{samples}}$  represent the number of data samples recorded after the exclusion of the initial 500  
255 ms and  $N_{\text{valid\_samples}}$  are the number of samples during which a valid gaze position was recorded.

### 256 ***Data analysis: Temporal precision***

257 We converted the recorded videos into images frame-by-frame through a converter program  
258 (Free Video to JPG Converter, version 5.0.101). We programmed an automatized method to  
259 detect the elapsed frames between the onset of the LEDs and the onset of the different dots. We  
260 used the Color Thresholder app from the Matlab Image Processing Toolbox (version 10.4) to  
261 manipulate the color components of sample frames via a hue, saturation, value (2HSV) color  
262 space. We created three separate RGB 2HSV segmentation masks: one for the LED's reflection  
263 on the HMD, one for the appearance of the green dot, and one for the appearance of the bright  
264 red dot (Figure 4). The masks indicated how many pixels in the frame contained the events. We  
265 created a script to count the number of frames between LEDs and the green dot onset and LEDs  
266 and bright red dot onset. For each frame, whenever the green and bright red dot were on or when  
267 the LEDs were on while using the Tobii Pro SDK, the script attributed a flag for a number of  
268 pixels greater than 10. When using the SRanipal, to differentiate between the first and the second  
269 pair of LEDs on, for each frame, the script attributed a flag whenever the number of pixels was  
270 greater or smaller than given values. This was possible since the second pair of LEDs cause a  
271 bigger reflection area (Figure 4, 2<sup>nd</sup> LED). The script identified the first LED pair when the  
272 number of pixels was greater than 10 and smaller than 250. A number greater than 300 indicated

273 the second pair of LEDs on. For the eye-detection scenario, both when using the Tobii Pro SDK  
274 and the SRanipal SDK, the script counted the flags from the LEDs onset until the green dot  
275 onset. For the gaze-contingent scenario, the count started with the second pair of LEDs onset and  
276 ended with the bright red dot appearance.

277 We plotted a histogram with the resulting intervals between events and tested for normal  
278 distribution with a one-sample Kolmogorov-Smirnov test. A boxplot is also plotted to compare  
279 the different scenarios displayed through the two SDKs. Temporal precision is calculated as the  
280 median of frame numbers elapsed between the LED and the different dot event multiplied by the  
281 mean duration of each video frame.

## 282 **Results**

### 283 **Results: Pre-Processing Eye-tracking accuracy and precision**

284 After data selection for each target, subjects had an average of 2550 data points in the head-still  
285 condition and 2692 points in the head-free condition; the central fixation target, used as a  
286 referencing point in the head-free condition, had 912 points (Figure 3).

### 287 ***Results: Eye-tracking accuracy and precision***

288 In the head-still condition, the one-way ANOVA resulted in no significant differences in  
289 accuracy between the two eyes ( $F(1,20) = 0.81$ ,  $p = 0.38$ ; mean left eye:  $4.16^\circ$  SD:  $\pm 1.49$  and  
290 mean right eye:  $4.75^\circ$  SD:  $\pm 1.63$ ; Figure 5 and 6). For this reason, we used the average across  
291 eyes (mean average both eyes:  $4.16^\circ$ , SD:  $\pm 1.40$ ) for the analysis. Precision has a mean of  $2.17^\circ$ ,  
292 SD:  $\pm 0.75$ . The BCEA shows that the accuracy and precision of the estimated gaze are worse at  
293 the most outer horizontal regions and that the central line has higher accuracy and precision than  
294 the most externally positioned targets, with the highest level of accuracy and precision for the  
295 central target (Figure 7). Comparing horizontal regions, a one-way ANOVA revealed that there  
296 is a significant difference in accuracy and precision ( $F(4,50) = 3.35$ ,  $p = 0.02$  for accuracy;  $F$   
297  $(4,50) = 3.6$ ,  $p = 0.01$  for precision). Post-hoc t-tests (Bonferroni corrected) show the center as  
298 being more accurate than the upper horizontal ( $p < 0.03$ , central row mean offset:  $2.26^\circ$ , SD:  
299  $\pm 0.73$ ; upper row mean offset:  $6.16^\circ$  SD:  $\pm 5.50$ ), and as more precise than the lower horizontal  
300 ( $p < 0.01$ , central row RMS mean:  $1.63^\circ$  SD:  $\pm 0.30$  and the lowest row RMS mean:  $3.15^\circ$ , SD:  
301  $\pm 2.00$ ). We plotted fixational eye movements and subjective data revealed unstable fixation  
302 patterns for the upper row (Figure 8) and deviations for the lower one (Figure 9).

303 Accuracy and precision become worse for different quantiles of users (Table 1). Starting from  
304 the 75<sup>th</sup> quantile both accuracy and precision showed an increase in imprecision, with accuracy  
305 passing from a visual angle of  $3.21^\circ$  to  $4.88^\circ$  and  $6.06^\circ$  and precision passing from  $1.63^\circ$  to  $2.51^\circ$   
306 and  $3.55^\circ$  from the 25<sup>th</sup> quantile to the 75<sup>th</sup> and 90<sup>th</sup> quantile respectively.

307 In the head-free condition, there is an overall average of precision of  $1.15^\circ$ , SD:  $\pm 0.69$ . Under  
308 head-movement one-way ANOVA revealed a significant difference in precision between  
309 Free<sub>stable</sub>, compared to phases of Free<sub>moving</sub> ( $F(1,18) = 8.64$ ,  $p < 0.01$ ; RMS mean<sub>stable</sub>:  
310  $0.76^\circ$ , SD<sub>stable</sub>:  $\pm 0.39$ , RMS mean<sub>moving</sub>:  $1.54^\circ$ , SD<sub>moving</sub>:  $\pm 0.74$ ) with a higher imprecision  
311 during periods in which subjects were moving their head. As to data loss, there is a double



312 amount of data slippage in the Free\_moving phase compared to when subjects were not moving  
313 their head (7.56% of data spillage compared to 3.69% of data spillage).

### 314 **Results: Temporal precision**

315 The one-sample Kolmogorov-Smirnov test showed that the intervals between LED and dot onset  
316 (Figure 10) are not extracted from a standard normal distribution, therefore a better indication for  
317 comparison between the temporal precision tests is the median (Figure 11).

318 In the eye-detection scenario, for the Tobii Pro SDK and the SRanipal, a median of 58.1 ms is  
319 found. In the gaze-contingent scenario, a median temporal precision of 58.1 ms is also found.

## 320 **Discussion**

321 We tested data quality and temporal precision of the HTC VIVE Pro Eye in VR to  
322 analyze the possible application of the system to VF perimetry testing and simulation of visual  
323 loss.

324 The head-still and head-free conditions showed different limitations of the embedded  
325 eye-tracker. The head-still condition evidenced the target position on the screen affected spatial  
326 precision. In comparison with the central line, inaccuracy is found for the upper horizontal line  
327 and imprecision for the lower one, both around 25° away from the midline. The upper horizontal  
328 line shows that fixations in regions above 25° from the midline are difficult. It is hypothesized  
329 that subjective facial configurations, such as the distance of the headset from the eyes, is  
330 shrinking the visual field and making fixation in that area more challenging. Below 25° from the  
331 midline, fixational points are more spread, and the eye-tracker is more imprecise.

332 In this study, the goal was to examine the precision of a heterogeneous study population.  
333 Data quality changes across the population point towards external factors affecting eye-tracking  
334 data quality, for example, the used eye correction. Reflections due to eye correction can affect  
335 precision when fixating targets placed at the edges (Dahlberg, 2010). Therefore, we hypothesize  
336 that the observed deviations could be in part affected by the type of eye correction the subjects  
337 were using. To study the influence of the habitual correction was not part of the study, but could  
338 be a successor study measuring more subjects.

339 The head-free condition evidenced how precision and data loss can be influenced by head  
340 movement: precision is lower, and a double amount of data loss occurs while moving.

341 These preliminary results indicate that the status quo of the HTC VIVE Pro Eye has  
342 limitations for VR VF perimetry testing. The pilot test evidenced that unfiltered data quality is  
343 affected for eccentricities above  $\pm 10^\circ$ , and at  $\pm 25^\circ$  data is significantly worse. The present  
344 results indicate that VR VF testing at  $\pm 10^\circ$  needs improvement. At this eccentricity, the HFA  
345 generally is used to detect advanced glaucoma (Asaoka, 2014). Steps to improve accuracy at  
346  $\pm 10^\circ$  are to increase the calibration points and position them at of areas of interest for the test  
347 (Holmqvist et al., 2012). The strong limitations observed at  $\pm 25^\circ$  indicate that the HTC Vive Pro  
348 Eye for VR perimetry testing to detect the early onset of glaucoma (Nouri-Mahdavi, 2014) is  
349 very restricted.

350 As to passive contingent studies that specifically require a small temporal precision,  
351 preliminary conditions should be kept in mind. An acceptable level of system's latency depends  
352 on the application. Ideally, the display should be updated immediately at the end of each saccade.  
353 In practice, this is limited since a lag always exists between identification of saccade ending,  
354 rendering the new image, transmitting it, and displaying it (Loschky and Wolverson, 2007). For

355 example, rendering the image can take from 25 up until 150 ms (Thomas and Geltmacher, 1993;  
356 Ohshima, et al., 1996; Geisler and Perry, 1998).

357 Furthermore, the display refresh rate can make a difference between a good or an  
358 acceptable level of latency (Saunders and Woods, 2014; Gibaldi et al., 2017). The eye tracker  
359 used in the HTC Vive Pro Eye has a higher refresh rate than the display, therefore, for this  
360 system, one part of the latency's variance can be due to the display's refresh. The direct, objective  
361 and automatic temporal precision tests showed that there is no difference between the detection  
362 of an eye and a gaze-contingent scenario. More so, displaying data through the Tobii Pro SDK or  
363 the SRanipal SDK makes no difference in terms of temporal precision.

364 For all the tests conducted, the median is a good indicator of temporal precision. The  
365 value of 58.1 ms makes the system suitable for one type of passive gaze-contingent application:  
366 multiresolution displays that can be applied to simulate tunnel vision (Stock et al., 2019).  
367 Multiresolution displays are generally used for foveated rendering, and latencies between 50 and  
368 70 ms are well accepted because modifications are made in the periphery, and they are not  
369 usually detected (Loschky and Wolverton, 2007; Albert et al., 2017). The reason why that  
370 happens is that changes in the postsaccade area mostly overlap with the changes in the  
371 presaccadic one (Saunders and Woods, 2014). On the other hand, if changes are made in the  
372 central area, such as for VR studies simulating scotomas (Ai et al., 2000; Banks and McCrindle,  
373 2008; Lewis et al., 2012; Jin et al., 2016; Väyrynen et al., 2016; Wu et al., 2018), where a mask  
374 is applied to central vision, a smaller latency is required. The postsaccade target is not already  
375 masked, therefore with latencies longer than saccade durations, there is the danger of central-  
376 vision hint of the target (Saunders and Woods, 2014).

377 For these applications, the HTC Vive Pro Eye needs improvement. Steps to improve  
378 latency in scotoma-simulated gaze-contingent VR studies are to predict where the saccade will  
379 likely end instead of using the current gaze position (Arabadzhiyska et al., 2017), or to apply  
380 bigger scotoma sizes. In the latter case, the reduction in latency is dependent upon saccades  
381 distances concerning the scotoma size (Saunders and Woods, 2014).

## 382 **Conclusion**

383 The present preliminary study shows that thanks to a temporal precision of 58.1 ms, HTC Vive  
384 Pro Eye is suited for peripheral visual field loss simulation and needs improvements for central  
385 visual loss simulation. The system needs adjustments also for advanced glaucoma VR VF  
386 perimetry detection and shows high limitations for early glaucoma detection onset due to eye-  
387 tracking data inaccuracy and impression at the custom visual field testing used by the HFA.

## 388 **Acknowledgments:**

389 This work was funded by the Federal Ministry of Education and Research of Germany in the  
390 framework of IDeA (project number 16SV8104). The authors acknowledge intra-mural funding  
391 of the University of Tübingen through the mini graduate school 'Integrative Augmented Reality  
392 (I-AR)'.  
393  
394  
395  
396

397 **Figures:**

398 **Figure 1**

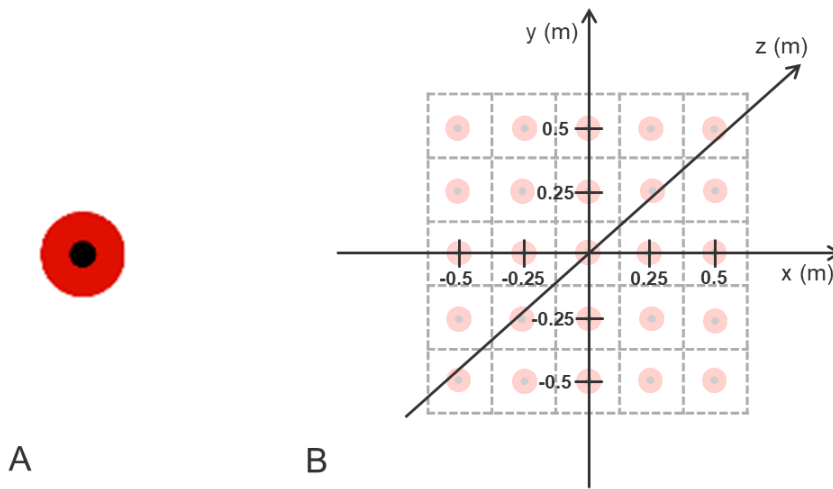

399 **Figure 1: Schematic representation of the data quality assessment set-up.** The target (A) is a virtual object with two  
400 concentric circles, one internal black one and one external red. Targets are distributed across 5 rows and 5 columns (3D world  
401 coordinate system, B) with origin the centre of the HMD.

402 **Figure 2**

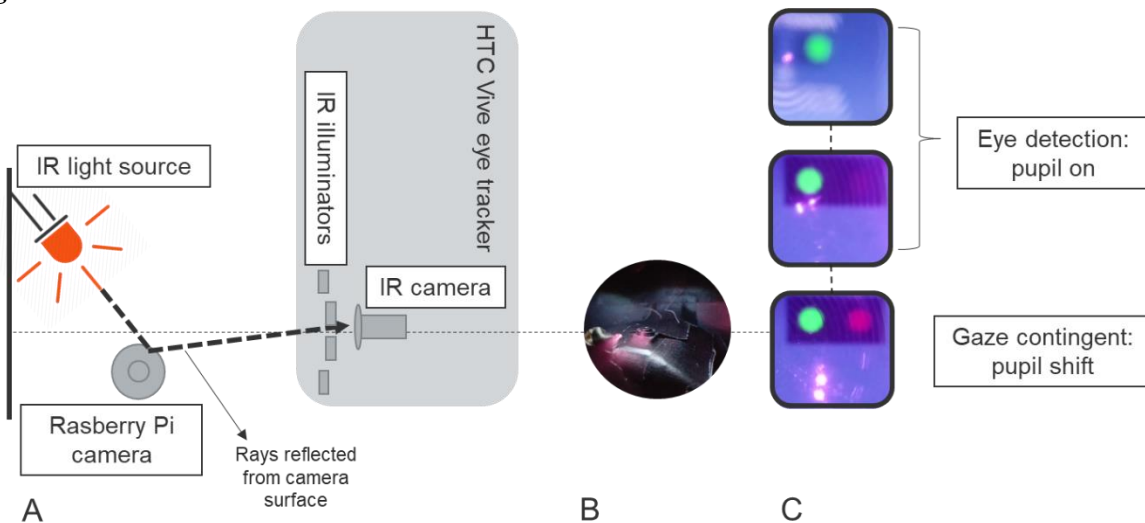

403 **Figure 2: Schematic representation of the temporal precision set-up.** IR light source (orange) represents the IR LEDs  
404 illuminating the Raspberry Pi camera (A, schematic and B, picture of the camera). The IR camera inside the HTC Vive Pro Eye  
405 captures the reflected rays by the Raspberry Pi camera (dotted lines). The Raspberry Pi camera can record the reflection as two  
406 separate events: as a reflection on the HMD lenses (pink dot), and as an artificial eye, the colored big dots (C). Upper and middle  
407 images are the eye-detection scenario, the last one is the gaze-contingent one. We collected data using the Tobii Pro SDK for the  
408 upper one and the SRanipal SDK for the last two ones.

409 **Figure 3**

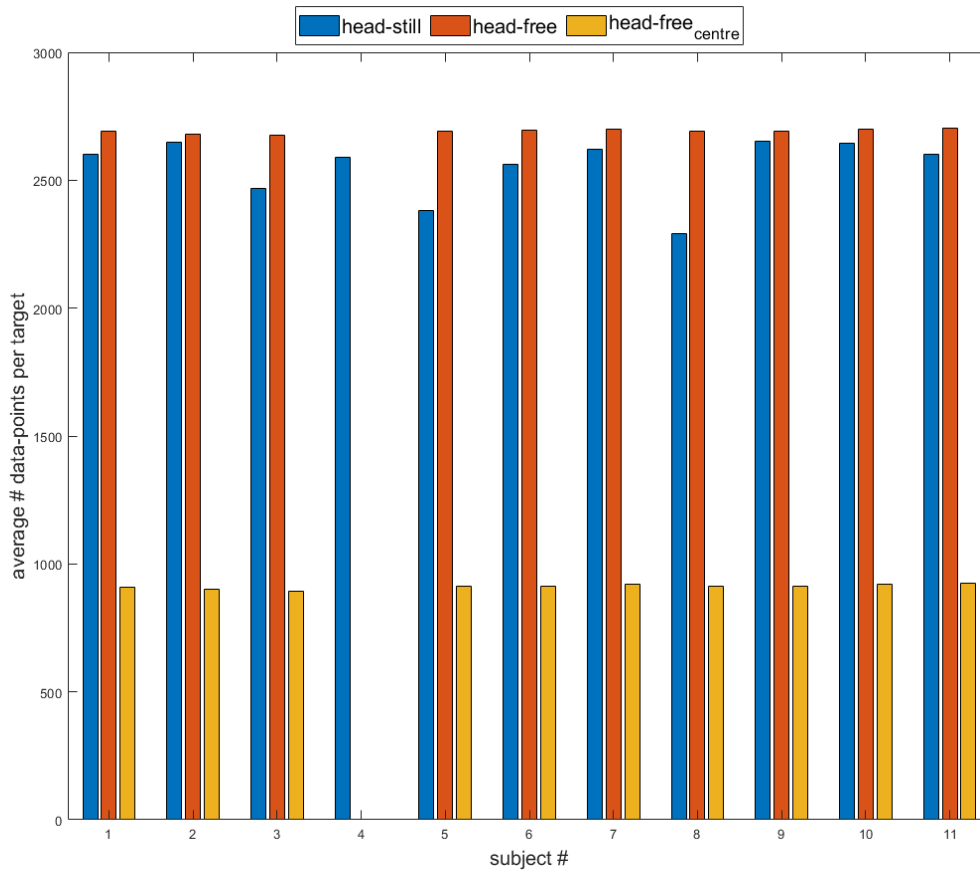

410 **Figure 3: Bar Plot for the average number of data points per target.** Blue bars represent data for the head-still condition, and  
 411 the orange and yellow bars are the data for the head-free one. The orange ones are the data collected for the 25 targets, and the  
 412 yellow bars are the points collected for the central referencing target.

413

414 **Figure 4**

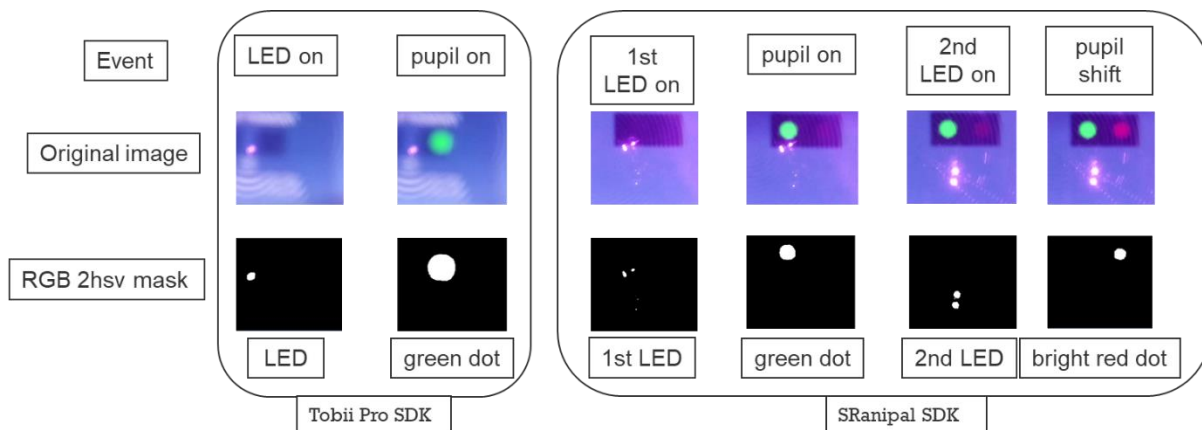

415 **Figure 4: Matlab generated a segmentation mask (RGB 2HSV) for events selection.** Upper images, frames containing the  
 416 different events. Lower images: output from Matlab's image segmentation mask (RGB 2HSV) of the selected events. The masks  
 417 automatically identified the LED and dot events.

418 **Figure 5**

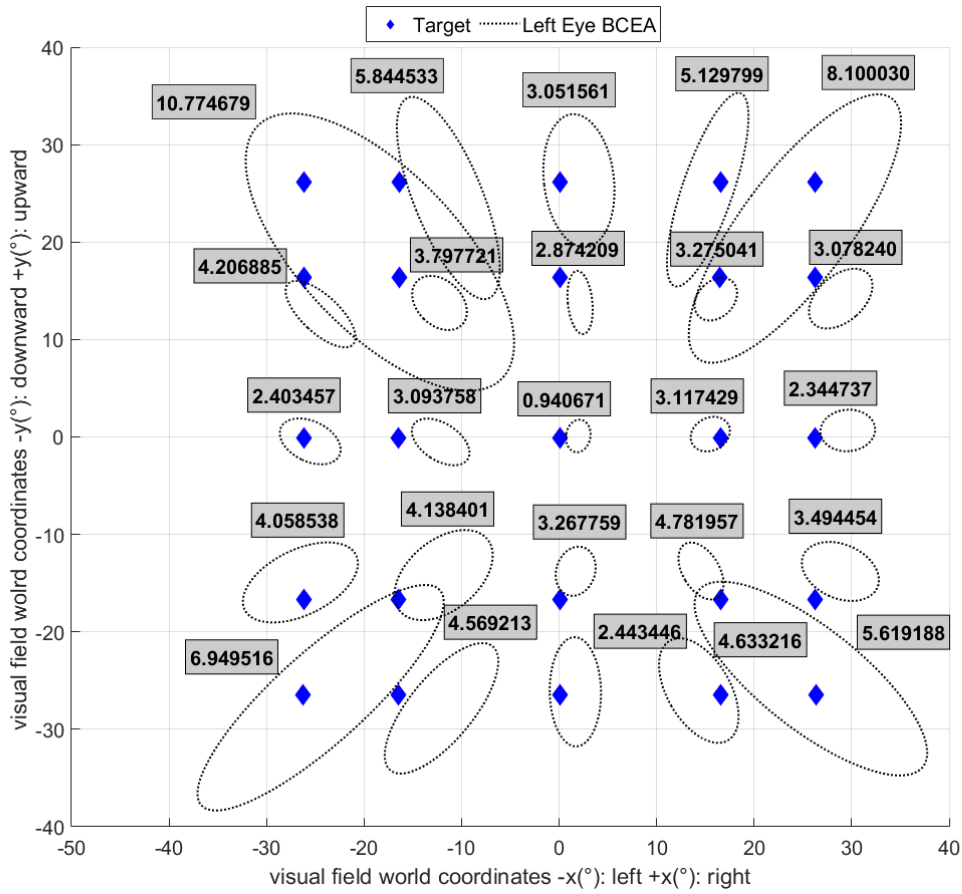

419 **Figure 5: BCEA of the estimated gaze points for the left eye.** Covariance ellipses (dotted lines) are fitted to the left eye's gaze  
420 points corresponding to all fixations of the same target across all subjects. The values inside the grey box are the left eye's  
421 average offset per target. The blue diamonds are the targets.

422 **Figure 6**

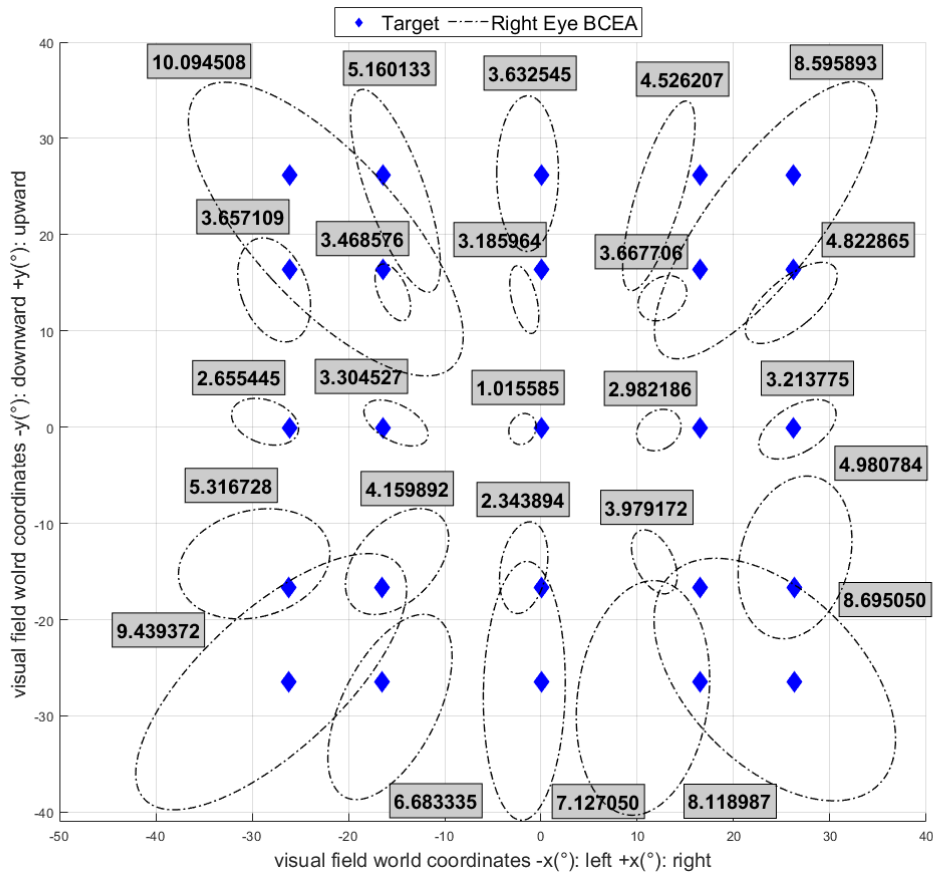

423 **Figure 6: BCEA of the estimated gaze points for the right eye.** All fixations for the right eye of the same target (blue diamond)  
424 across all subjects are fitted to covariance ellipses (dotted lines) and the grey boxes contain the average offset value per each  
425 target.

426 **Figure 7**

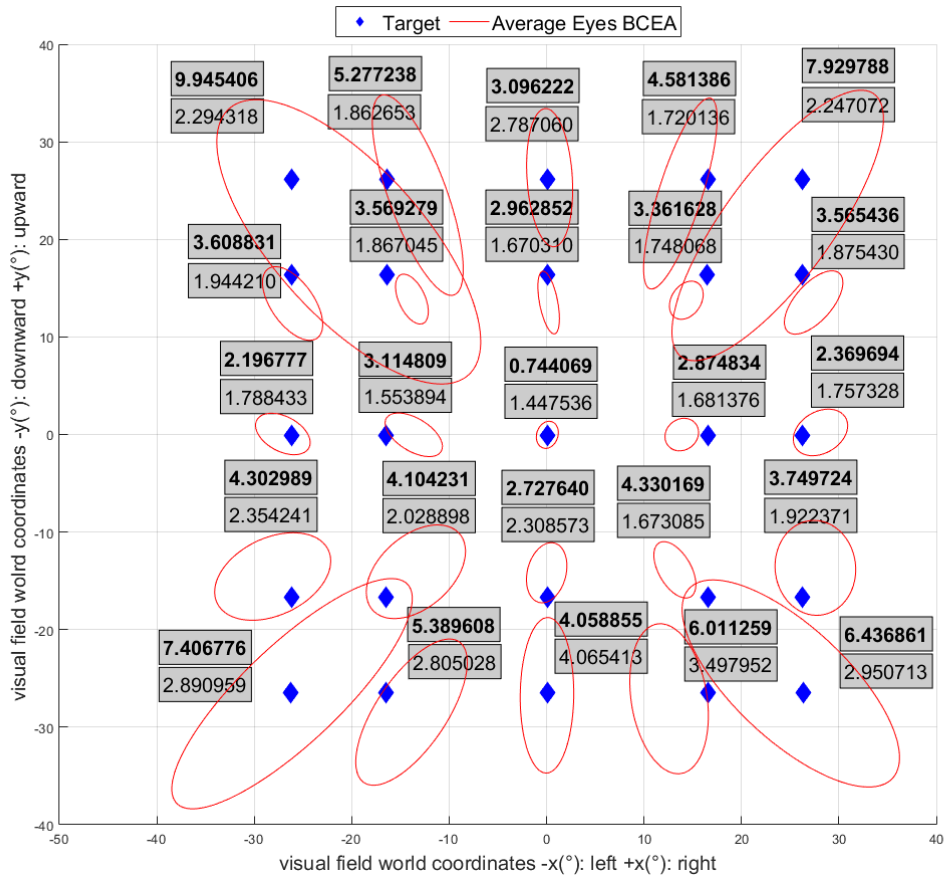

427 **Figure 7: BCEA of the estimated gaze points for the average of both eyes.** Covariance ellipses of the average of both eyes  
428 (red lines) are fitted to the gaze points corresponding to all fixations of the same target across all subjects. The grey box shows  
429 mean offset (in bold) and RMS (normal) for each target.

430 **Figure 8**

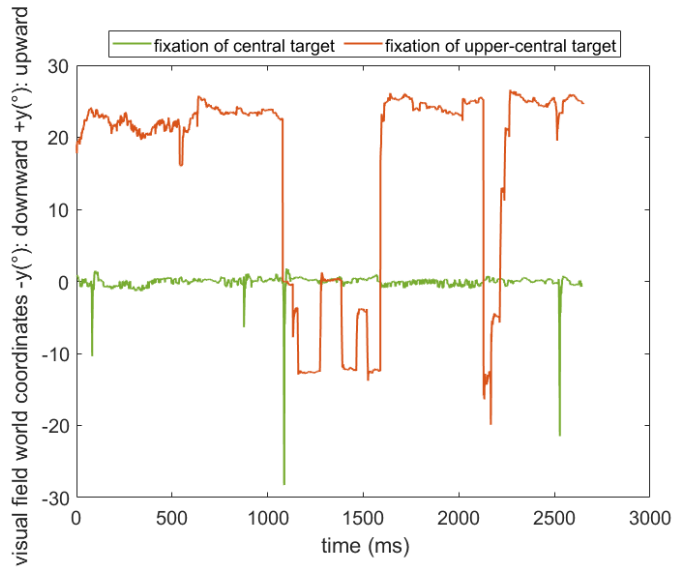

431 **Figure 8: Subjective fixational data of targets positioned in the first row.** Fixations plotted across time evidence an unstable  
432 fixation of the upper-central target (oscillations from the intended target position to center, further down from center and back)  
433 compared to a central one (green).

434

435 **Figure 9**

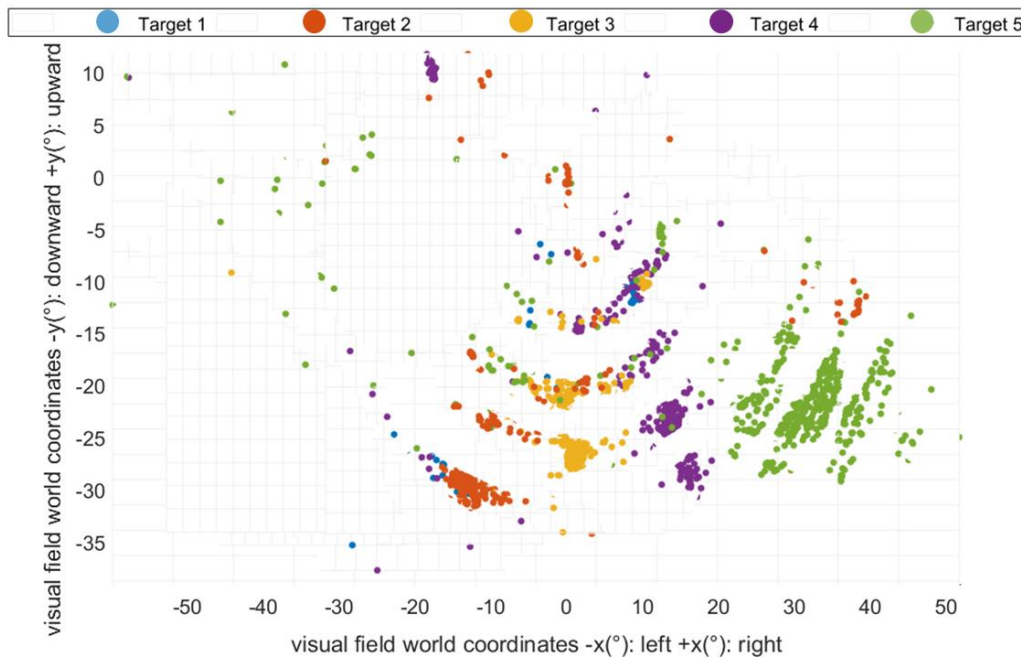

436 **Figure 9: Scatter plot of fixation points of the last row.** Starting from left to right target 1 is the most left one positioned in the  
437 last row till target 5, the most right one. Blue, orange, yellow, lilac, and green are all fixation points belonging to target 1,2,3,4  
438 and 5 respectively.



439 **Figure 10**

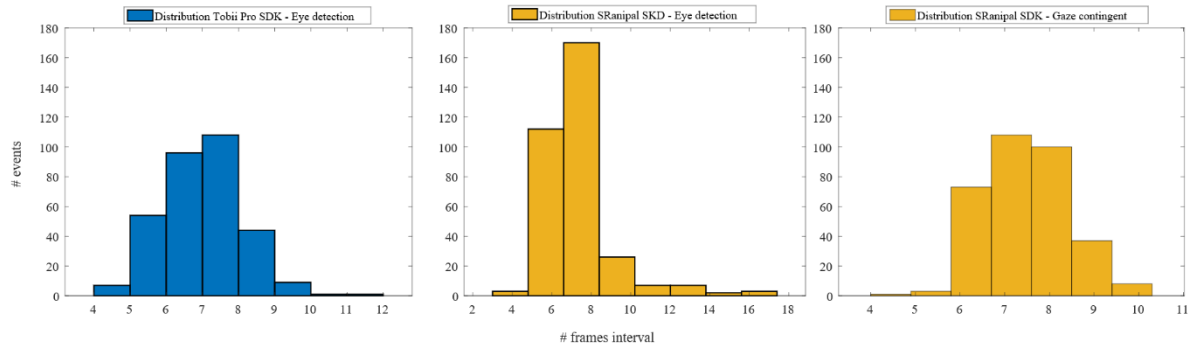

440 **Figure 10: LED-dot frame interval histograms for the eye-detection and the gaze-contingent scenarios.** The blue histogram  
441 indicates the number of frame distribution when using the Tobii Pro SDK for the LED on-eye on, in the eye-detection scenario  
442 (black contour). The yellow histograms show the frame distribution when using the SRanipal SDK. The first yellow one shows  
443 the number of frame distribution in the eye-detection scenario (black contour) and the second yellow one in the gaze-contingent  
444 scenario (LED on – eye shift).

445 **Figure 11**

446

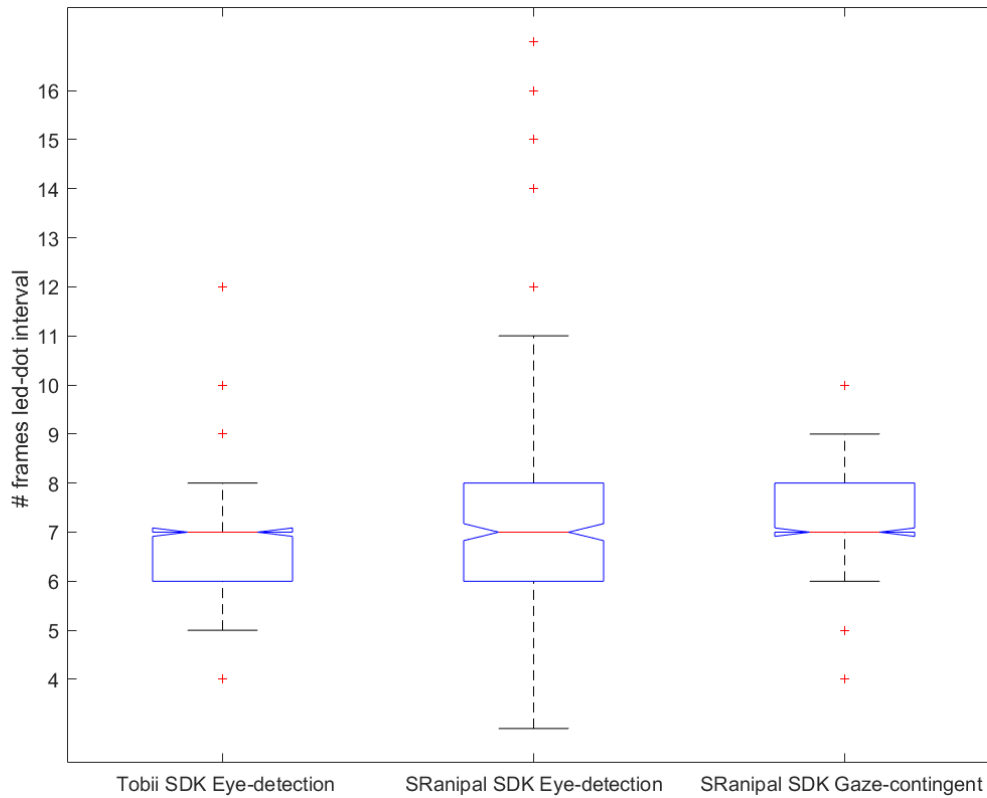

447 **Figure 11: Box plots with LED-dot frame intervals for each scenario.** The red line represents the median.

448

449 **Tables:**

450 ***Table 1***

|                              | <b>Accuracy (°)</b> | <b>Precision (°)</b> |
|------------------------------|---------------------|----------------------|
| <b>Quantile (head-still)</b> |                     |                      |
| 25%                          | 3.21                | 1.63                 |
| 50%                          | 3.98                | 1.95                 |
| 75%                          | 4.88                | 2.51                 |
| 90%                          | 6.06                | 3.55                 |

451

452 **Table 1: Average accuracy and precision across different percentiles of each target in the head-still condition.**

453

454

455

456

457

458

459

460

461

462

463

464

465

466

467

468

469

470

471

472

## 473 References

- 474 Ai, Z., Gupta, B. K., Rasmussen, M., Lin, Y. J., Dech, F., Panko, W., & Silverstein, J. C.  
475 (2000). Simulation of eye diseases in a virtual environment. In *Proceedings of the 33rd Annual*  
476 *Hawaii International Conference on System Sciences* (pp. 5-pp). IEEE.
- 477 Albert, R., Patney, A., Luebke, D., & Kim, J. (2017). Latency requirements for foveated  
478 rendering in virtual reality. *ACM Transactions on Applied Perception (TAP)*, 14(4), 1-13.
- 479 Arabadzhiyska, E., Tursun, O. T., Myszkowski, K., Seidel, H. P., & Didyk, P. (2017).  
480 Saccade landing position prediction for gaze-contingent rendering. *ACM Transactions on*  
481 *Graphics (TOG)*, 36(4), 1-12.
- 482 Asaoka R. (2014). Mapping glaucoma patients' 30-2 and 10-2 visual fields reveals  
483 clusters of test points damaged in the 10-2 grid that are not sampled in the sparse 30-2 grid. *PloS*  
484 *one*, 9(6), e98525.
- 485 Bahill, A. T., Brockenbrough, A., & Troost, B. T. (1981). Variability and development of  
486 a normative data base for saccadic eye movements. *Investigative ophthalmology & visual*  
487 *science*, 21(1), 116-125.
- 488 Baloh, R. W., Sills, A. W., Kumley, W. E., & Honrubia, V. (1975). Quantitative  
489 measurement of saccade amplitude, duration, and velocity. *Neurology*, 25(11), 1065-1065.
- 490 Banks, D., & McCrindle, R. J. (2008). Visual eye disease simulator. *Proc. 7th ICDVRAT*  
491 *with ArtAbilitation, Maia, Portugal*.
- 492 Barraza-Bernal, M. J., Rifai, K., & Wahl, S. (2017a). A preferred retinal location of  
493 fixation can be induced when systematic stimulus relocations are applied. *Journal of Vision*,  
494 17(2), 11-11.
- 495 Barraza-Bernal, M. J., Ivanov, I. V., Nill, S., Rifai, K., Trauzettel-Klosinski, S., & Wahl,  
496 S. (2017b). Can positions in the visual field with high attentional capabilities be good candidates  
497 for a new preferred retinal locus?. *Vision Research*, 140, 1-12.
- 498 Barraza-Bernal, M. J., Rifai, K., & Wahl, S. (2018). The retinal locus of fixation in  
499 simulations of progressing central scotomas. *Journal of Vision*, 18(1), 7-7.
- 500 Becker, W. (1989). The neurobiology of saccadic eye movements. Metrics. *Reviews of*  
501 *oculomotor research*, 3, 13-67.
- 502 Behrens, F., MacKeben, M., & Schröder-Preikschat, W. (2010). An improved algorithm  
503 for automatic detection of saccades in eye movement data and for calculating saccade  
504 parameters. *Behavior research methods*, 42(3), 701-708.
- 505 Berger, S., & Porell, F. (2008). The association between low vision and function. *Journal*  
506 *of Aging and Health*, 20(5), 504-525.
- 507 Bertera, J. H. (1988). The effect of simulated scotomas on visual search in normal  
508 subjects. *Investigative Ophthalmology & Visual Science*, 29(3), 470-475.
- 509 Bertera, J. H. (1992). Oculomotor adaptation with virtual reality scotomas. *Simulation*,  
510 59(1), 37-43.

- 511 Blignaut, P., & Beelders, T. (2012). The precision of eye-trackers: a case for a new  
512 measure. In *Proceedings of the symposium on eye tracking research and applications* (pp. 289-  
513 292).
- 514 Borges, M., Symington, A., Coltin, B., Smith, T., & Ventura, R. (2018). HTC Vive:  
515 analysis and accuracy improvement. In *2018 IEEE/RSJ International Conference on Intelligent*  
516 *Robots and Systems (IROS)* (pp. 2610-2615). IEEE.
- 517 Brooks, B. A., & Fuchs, A. F. (1975). Influence of stimulus parameters on visual  
518 sensitivity during saccadic eye movement. *Vision Research*, *15*(12), 1389-1398.
- 519 Buswell, G. T. (1935). *How people look at pictures*. Chicago: University of Chicago  
520 Press.
- 521 Clemotte, A., Velasco, M., Torricelli, D., Raya, R., & Ceres, R. (2014). Accuracy and  
522 precision of the Tobii X2-30 eye-tracking under non ideal conditions. *Eye*, *16*(3), 2.
- 523 Dahlberg, J. (2010). Eye tracking with eye glasses.
- 524 Danforth, R., Duchowski, A., Geist, R., & McAliley, E. (2000). A platform for gaze-  
525 contingent virtual environments. In *Smart Graphics (Papers from the 2000 AAAI Spring*  
526 *Symposium, Technical Report SS-00-04)* (pp. 66-70).
- 527 Delabarre, E. B. (1898). A method of recording eye-movements. *The American Journal*  
528 *of Psychology*, *9*(4), 572-574.
- 529 Donders, F. C. (1857). Beiträge zur pathologischen Anatomie des Auges. *Archiv für*  
530 *Ophthalmologie*, *3*(1), 139-165.
- 531 Elichev, V. P., Ermolaev, A. P., Antonov, A. A., Grigoryan, G. L., & Kosova, D. V.  
532 (2018). Novye vozmozhnosti issledovaniia polia zreniia (predvaritel'noe soobshchenie) [New  
533 visual field testing possibilities (a preliminary report)]. *Vestnik oftalmologii*, *134*(2), 66–72.
- 534 Feit, A. M., Williams, S., Toledo, A., Paradiso, A., Kulkarni, H., Kane, S., & Morris, M.  
535 R. (2017). Toward everyday gaze input: Accuracy and precision of eye tracking and implications  
536 for design. In *Proceedings of the 2017 Chi conference on human factors in computing systems*  
537 (pp. 1118-1130).
- 538 Geisler, W. S., & Perry, J. S. (1998,). Real-time foveated multiresolution system for low-  
539 bandwidth video communication. In *Human vision and electronic imaging III* (Vol. 3299, pp.  
540 294-305). International Society for Optics and Photonics.
- 541 Geringswald, F., & Pollmann, S. (2015). Central and peripheral vision loss differentially  
542 affects contextual cueing in visual search. *Journal of experimental psychology: learning,*  
543 *memory, and cognition*, *41*(5), 1485.
- 544 Gibaldi, A., Vanegas, M., Bex, P. J., & Maiello, G. (2017). Evaluation of the Tobii EyeX  
545 Eye tracking controller and Matlab toolkit for research. *Behavior research methods*, *49*(3), 923-  
546 946.
- 547 Groves, L. A., Carnahan, P., Allen, D. R., Adam, R., Peters, T. M., & Chen, E. C. (2019).  
548 Accuracy assessment for the co-registration between optical and VIVE head-mounted display  
549 tracking. *International journal of computer assisted radiology and surgery*, *14*(7), 1207-1215.

- 550 Hollander, D. A., Volpe, N. J., Moster, M. L., Liu, G. T., Balcer, L. J., Judy, K. D., &  
551 Galetta, S. L. (2000). Use of a portable head mounted perimetry system to assess bedside visual  
552 fields. *The British journal of ophthalmology*, 84(10), 1185–1190.
- 553 Holmqvist, K., Nyström, M., Andersson, R., Dewhurst, R., Jarodzka, H., & Van de  
554 Weijer, J. (2011). *Eye tracking: A comprehensive guide to methods and measures*. OUP Oxford.
- 555 Holmqvist, K., Nyström, M., & Mulvey, F. (2012). Eye tracker data quality: what it is  
556 and how to measure it. In *Proceedings of the symposium on eye tracking research and*  
557 *applications* (pp. 45-52).
- 558 Holmqvist, K., Zemblys, R., & Beelders, T. (2017). Magnitude and nature of variability  
559 in eye-tracking data. *Proceedings of the ECEM*, 2017.
- 560 Huey, E. B. (1898). Preliminary experiments in the physiology and psychology of  
561 reading. *The American Journal of Psychology*, 9(4), 575-586.
- 562 Jager, R. D., Mieler, W. F., & Miller, J. W. (2008). Age-related macular degeneration.  
563 *New England Journal of Medicine*, 358(24), 2606-2617.
- 564 Jin, B., Ai, Z., & Rasmussen, M. (2006). Simulation of eye disease in virtual reality. In  
565 *2005 IEEE Engineering in Medicine and Biology 27th Annual Conference* (pp. 5128-5131).  
566 IEEE.
- 567 Kasha Jr, J. R. (1998). *U.S. Patent No. 5,737,060*. Washington, DC: U.S. Patent and  
568 Trademark Office.
- 569 Kwon, M., Nandy, A. S., & Tjan, B. S. (2013). Rapid and persistent adaptability of  
570 human oculomotor control in response to simulated central vision loss. *Current Biology*, 23(17),  
571 1663-1669.
- 572 Lewis, J., Shires, L., & Brown, D. (2012). Development of a visual impairment simulator  
573 using the Microsoft XNA Framework. In *Proc. 9th Intl Conf. Disability, Virtual Reality &*  
574 *Associated Technologies, Laval, France*.
- 575 Lohr, D. J., Friedman, L., & Komogortsev, O. V. (2019). Evaluating the Data Quality of  
576 Eye Tracking Signals from a Virtual Reality System: Case Study using SMI's Eye-Tracking HTC  
577 Vive. *arXiv preprint arXiv:1912.02083*.
- 578 Loschky, L. C., & Wolverton, G. S. (2007). How late can you update gaze-contingent  
579 multiresolutional displays without detection?. *ACM Transactions on Multimedia Computing,*  
580 *Communications, and Applications (TOMM)*, 3(4), 1-10.
- 581 Mantravadi, A. V., & Vadhar, N. (2015). Glaucoma. *Primary care*, 42(3), 437–449.
- 582 Mees, L., Upadhyaya, S., Kumar, P., Kotawala, S., Haran, S., Rajasekar, S., Friedman, D.  
583 S., & Venkatesh, R. (2020). Validation of a Head-mounted Virtual Reality Visual Field  
584 Screening Device. *Journal of glaucoma*, 29(2), 86–91.
- 585 Munoz, D. P., Broughton, J. R., Goldring, J. E., & Armstrong, I. T. (1998). Age-related  
586 performance of human subjects on saccadic eye movement tasks. *Experimental brain research*,  
587 121(4), 391-400.

- 588 Niehorster, D. C., Li, L., & Lappe, M. (2017). The accuracy and precision of position and  
589 orientation tracking in the HTC vive virtual reality system for scientific research. *i-Perception*,  
590 8(3), 2041669517708205.
- 591 Niehorster, D. C., Santini, T., Hessels, R. S., Hooge, I. T., Kasneci, E., & Nyström, M.  
592 (2020). The impact of slippage on the data quality of head-worn eye trackers. *Behavior Research*  
593 *Methods*, 1-21.
- 594 Nouri-Mahdavi, K. (2014). Selecting visual field tests and assessing visual field  
595 deterioration in glaucoma. *Canadian Journal of Ophthalmology*, 49(6), 497-505.
- 596 Ohshima, T., Yamamoto, H., & Tamura, H. (1996). Gaze-directed adaptive rendering for  
597 interacting with virtual space. In *Proceedings of the IEEE 1996 Virtual Reality Annual*  
598 *International Symposium* (pp. 103-110). IEEE.
- 599 Orquin, J. L., & Holmqvist, K. (2018). Threats to the validity of eye-movement research  
600 in psychology. *Behavior research methods*, 50(4), 1645-1656.
- 601 Peer, A., Ullrich, P., & Ponto, K. (2018). Vive tracking alignment and correction made  
602 easy. In *2018 IEEE conference on virtual reality and 3D user interfaces (VR)* (pp. 653-654).  
603 IEEE.
- 604 Plummer, D. J., Lopez, A., Azen, S. P., LaBree, L., Bartsch, D. U., Sadun, A. A., &  
605 Freeman, W. R. (2000). Correlation between static automated and scanning laser entoptic  
606 perimetry in normal subjects and glaucoma patients. *Ophthalmology*, 107(9), 1693–1701.
- 607 Pro, T. (2015a). How do Tobii Eye Trackers work? Retrieved from  
608 [https://www.tobii.com/learn-and-support/learn/eye-tracking-essentials/how-do-tobii-eye-](https://www.tobii.com/learn-and-support/learn/eye-tracking-essentials/how-do-tobii-eye-trackers-work/)  
609 [trackers-work/](https://www.tobii.com/learn-and-support/learn/eye-tracking-essentials/how-do-tobii-eye-trackers-work/)
- 610 Pro, T. (2015b). Tobii Pro SDK. Retrieved from [https://www.tobii.com/product-](https://www.tobii.com/product-listing/tobii-pro-sdk/)  
611 [listing/tobii-pro-sdk/](https://www.tobii.com/product-listing/tobii-pro-sdk/)
- 612 Rayner, K., Foorman, B. R., Perfetti, C. A., Pesetsky, D., & Seidenberg, M. S. (2001).  
613 How psychological science informs the teaching of reading. *Psychological science in the public*  
614 *interest*, 2(2), 31-74.
- 615 Reingold, E. M. (2014). Eye tracking research and technology: Towards objective  
616 measurement of data quality. *Visual cognition*, 22(3-4), 635-652.
- 617 Riggs, L. A., Volkman, F. C., Moore, R. K., & Ellicott, A. G. (1982). Perception of  
618 suprathreshold stimuli during saccadic eye movement. *Vision research*, 22(4), 423-428.
- 619 Saunders, D. R., & Woods, R. L. (2014). Direct measurement of the system latency of  
620 gaze-contingent displays. *Behavior research methods*, 46(2), 439-447.
- 621 Stock, S. C., Erler, C., Stork, W., Labuz, G., Son, H. S., Khoramnia, R., & Auffarth, G.  
622 U. (2019). Suitability of virtual reality for vision simulation—a case study using glaucomatous  
623 visual fields. *Investigative Ophthalmology & Visual Science*, 60(9), 2441-2441.
- 624 Tanriverdi, V., & Jacob, R. J. (2000). Interacting with eye movements in virtual  
625 environments. In *Proceedings of the SIGCHI conference on Human Factors in Computing*  
626 *Systems* (pp. 265-272).

- 627 Tech., T (2019). IS5 Platform. Retrieved from <https://tech.tobii.com/technology/is5->  
628 [platform/](https://tech.tobii.com/technology/is5-platform/)
- 629 Thickbroom, G. W., Knezevic, W., Carroll, W. M., & Mastaglia, F. L. (1991). Saccade  
630 onset and offset lambda waves: relation to pattern movement visually evoked potentials. *Brain*  
631 *research*, 551(1-2), 150-156.
- 632 Thomas, M., & Geltmacher, H. (1993). Combat simulator display development.  
633 *Information Display*, 9, 23-23.
- 634 Thylefors, B., Negrel, A. D., Pararajasegaram, R., & Dadzie, K. Y. (1995). Global data  
635 on blindness. *Bulletin of the world health organization*, 73(1), 115.
- 636 Trope GE, Eizenman M, Coyle E. Eye movement perimetry in glaucoma. *Can J*  
637 *Ophthalmol.* 1989;24(5):197-199.
- 638 Tsapakis, S., Papaconstantinou, D., Diagourtas, A., Droutsas, K., Andreanos, K.,  
639 Moschos, M. M., & Brouzas, D. (2017). Visual field examination method using virtual reality  
640 glasses compared with the Humphrey perimeter. *Clinical ophthalmology (Auckland, N.Z.)*, 11,  
641 1431–1443.
- 642 Väyrynen, J., Colley, A., & Häkkinen, J. (2016). Head mounted display design tool for  
643 simulating visual disabilities. In *Proceedings of the 15th International Conference on Mobile*  
644 *and Ubiquitous Multimedia* (pp. 69-73).
- 645 Vive, H. (2019a) Vive Pro Eye. Retrieved from <https://www.vive.com/eu/product/vive->  
646 [pro-eye/](https://www.vive.com/eu/product/vive-pro-eye/)
- 647 Vive, H. (2019b) Vive Developer Resources Retrieved from  
648 <https://developer.vive.com/resources/knowledgebase/vive-sranipal-sdk/>
- 649 Walsh, D. V., & Liu, L. (2014). Adaptation to a simulated central scotoma during visual  
650 search training. *Vision research*, 96, 75–86.
- 651 Warabi, T., Kase, M., & Kato, T. (1984). Effect of aging on the accuracy of visually  
652 guided saccadic eye movement. *Annals of Neurology: Official Journal of the American*  
653 *Neurological Association and the Child Neurology Society*, 16(4), 449-454.
- 654 Wiltz, C. (2019). The HTC Vive Pro Eye Brings Eye Tracking to Engineers in VR.  
655 Retrieved from <https://www.designnews.com/electronics-test/htc-vive-pro-eye-brings-eye->  
656 [tracking-engineers-vr/9073297860970](https://www.designnews.com/electronics-test/htc-vive-pro-eye-brings-eye-tracking-engineers-vr/9073297860970)
- 657 Wroblewski, D., Francis, B. A., Sadun, A., Vakili, G., & Chopra, V. (2014). Testing of  
658 visual field with virtual reality goggles in manual and visual grasp modes. *BioMed research*  
659 *international*, 2014.
- 660 Wu, H., Ashmead, D. H., Adams, H., & Bodenheimer, B. (2018). Using virtual reality to  
661 assess the street crossing behavior of pedestrians with simulated macular degeneration at a  
662 roundabout. *Frontiers in ICT*, 5, 27.
- 663 Zangemeister, W. H., & Oechsner, U. (1999). Adaptation to visual field defects with  
664 virtual reality scotoma in healthy subjects. In *Current oculomotor research* (pp. 89-92). Springer,  
665 Boston, MA.
- 666
